# Supplementary material for: Interaction between poly(A)–binding protein PABPC4 and nuclear receptor corepressor NCoR1 modulates a metabolic stress response
Source: PubMed Central journal article supplement (PMC10203745; doi:10.1016/j.jbc.2023.104702), 2023-04-12

# Suppl. Figure 1

## A

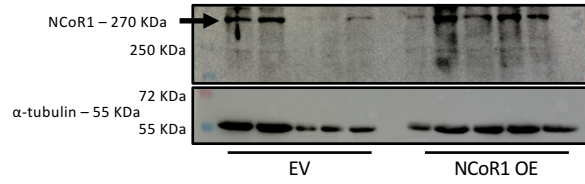

## B

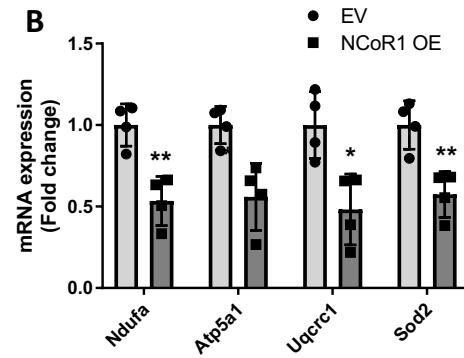

## C

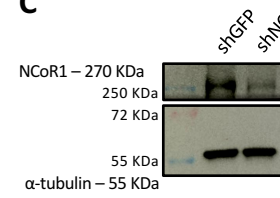

## D

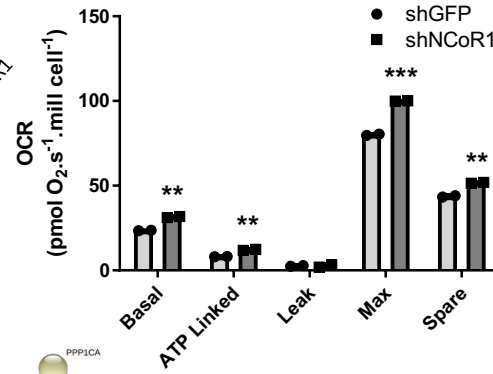

## E

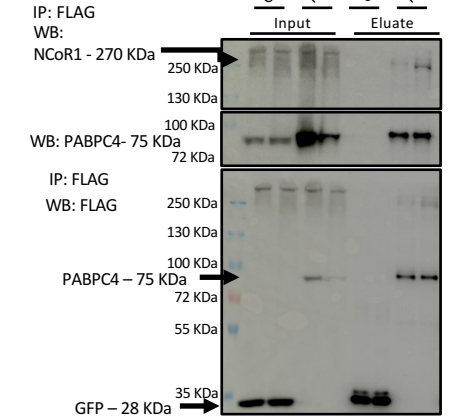

## F

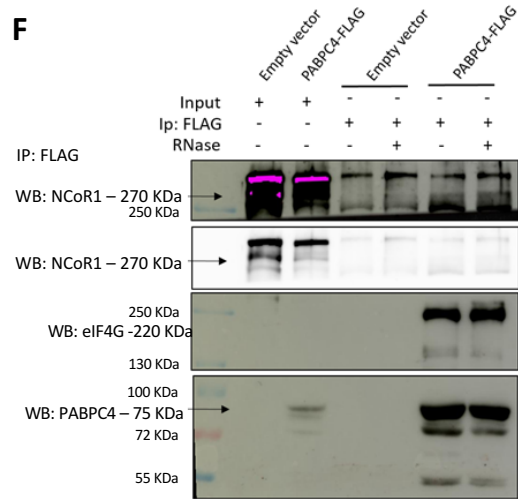

## G

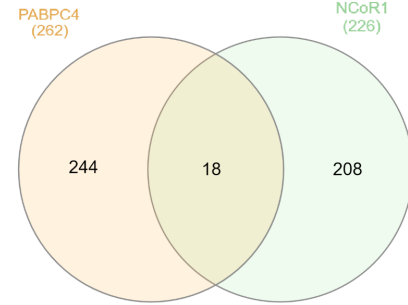

## H

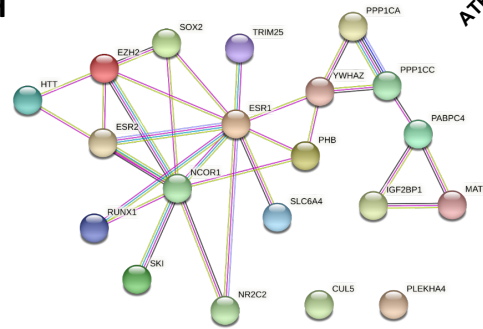

## I

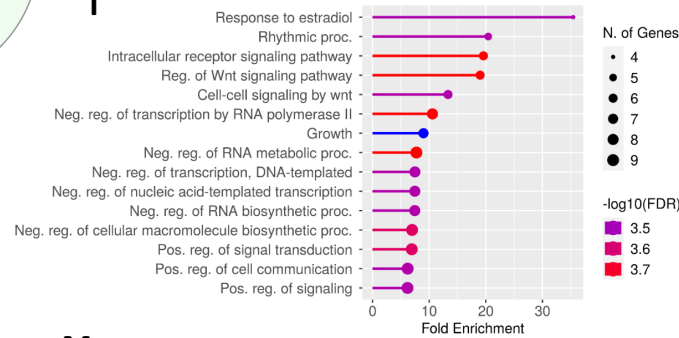

## J

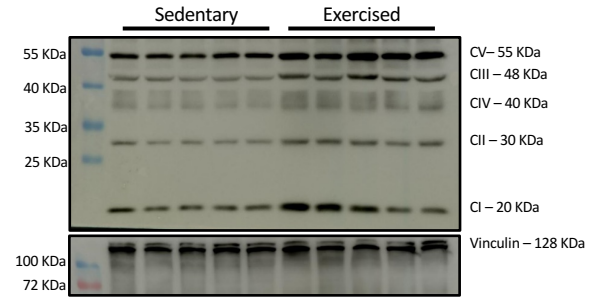

## K

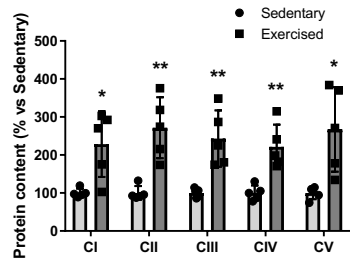

## L

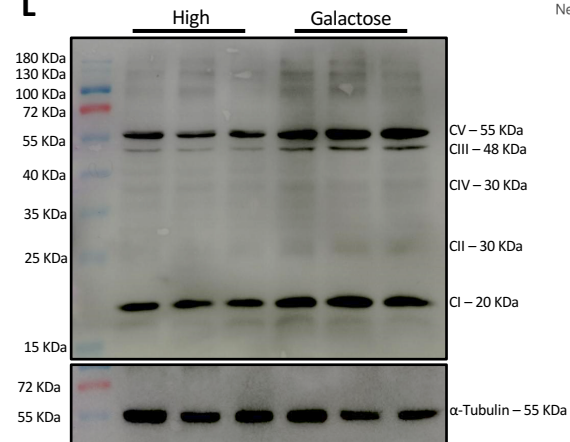

## M

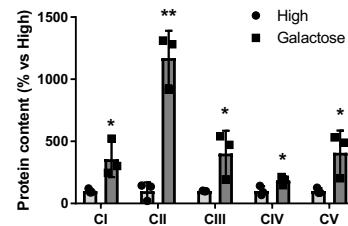

## N

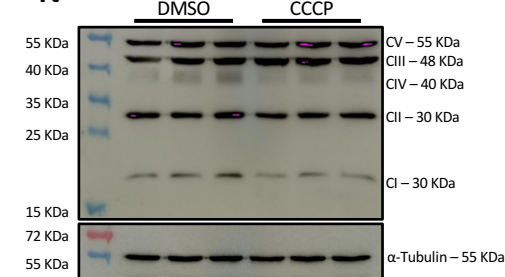

## O

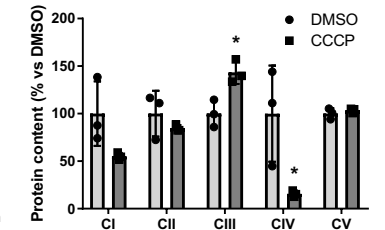

Supplement: mmc1.pdf [file mmc1.pdf]
