# Supplementary material for: Interaction between poly(A)–binding protein PABPC4 and nuclear receptor corepressor NCoR1 modulates a metabolic stress response
Source: PubMed Central journal article supplement (PMC10203745; doi:10.1016/j.jbc.2023.104702), 2023-04-12

# Suppl. Figure 4

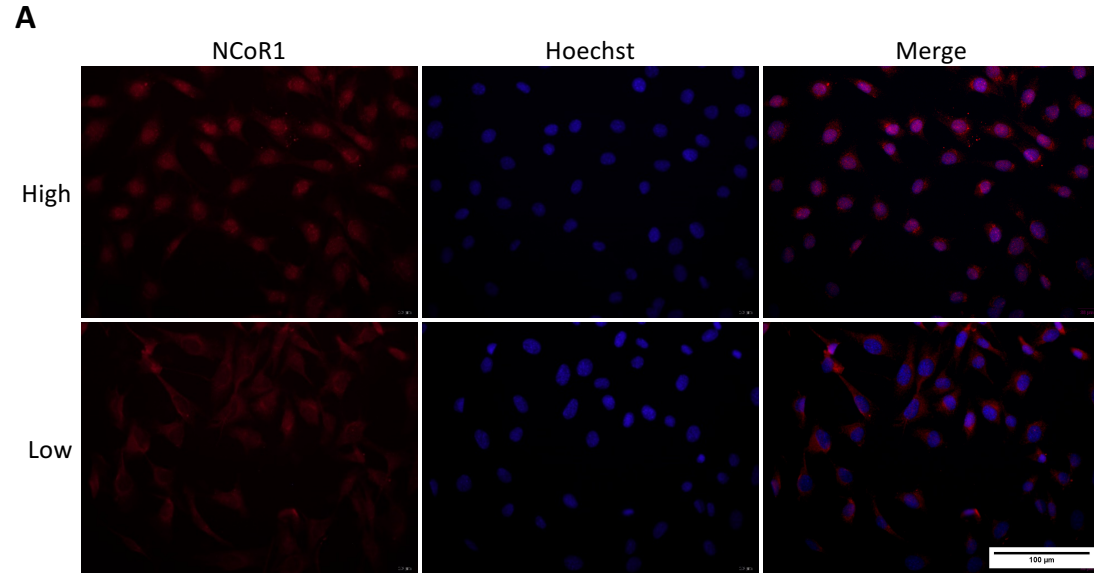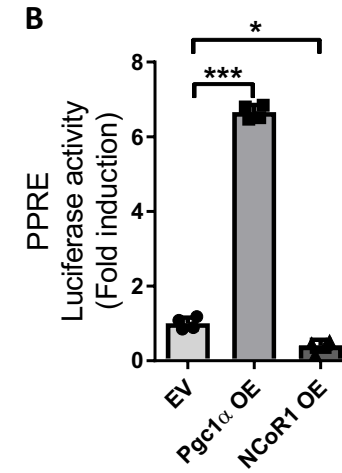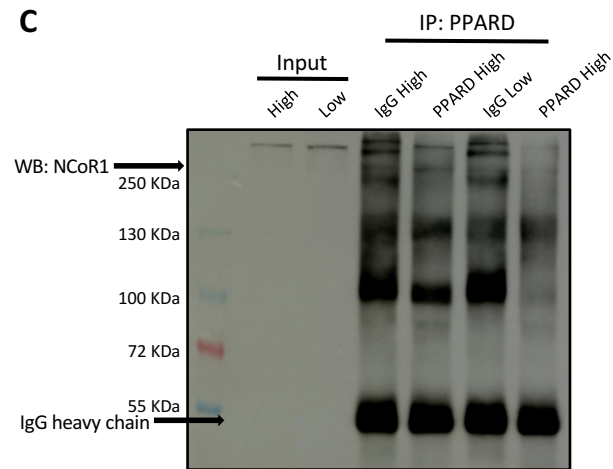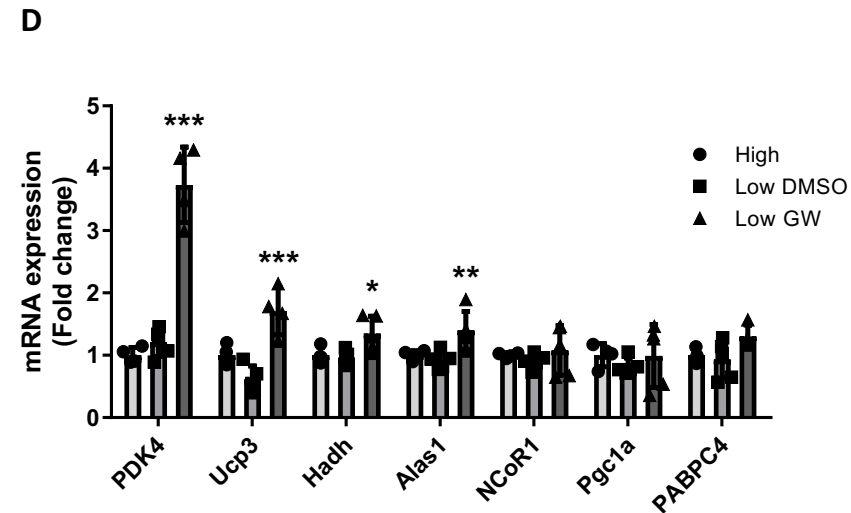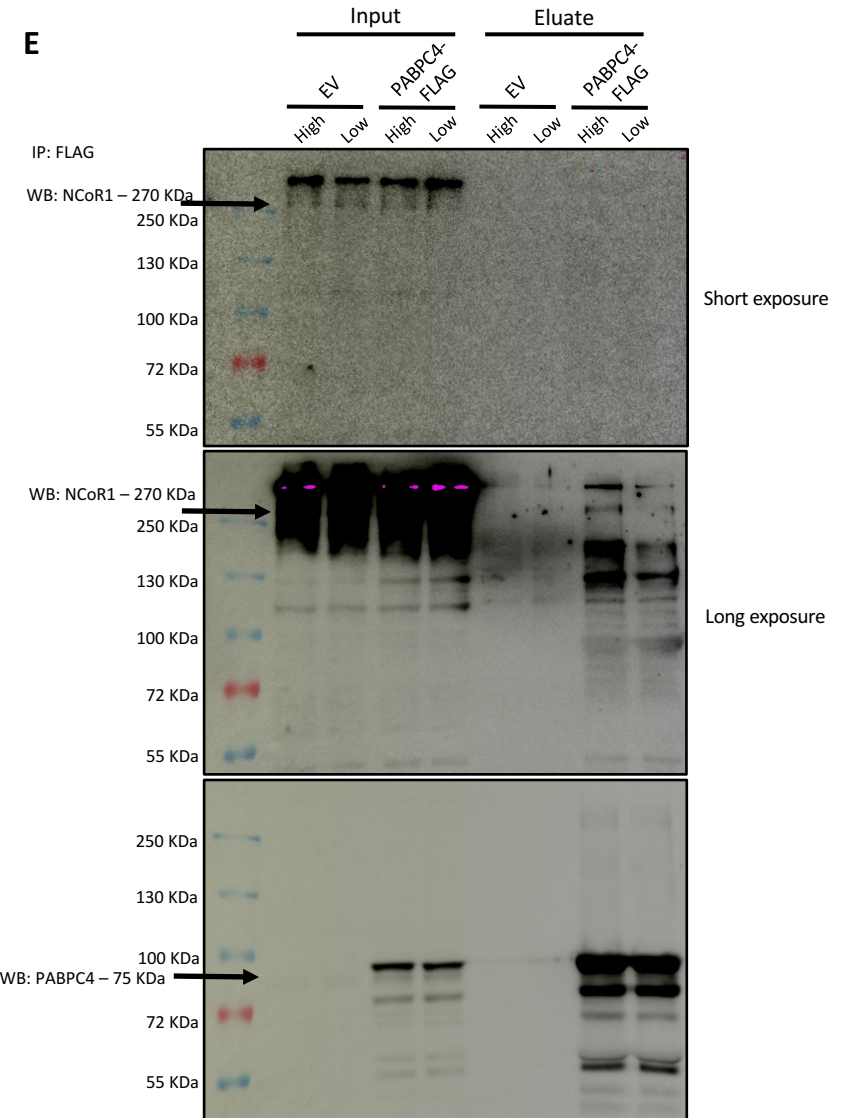

Supplement: mmc4.pdf [file mmc4.pdf]
